# Supplementary material
Source: publisher figshare collection journal article supplement (https://gsajournals.figshare.com/ndownloader/files/17930531)
Supplement: Supplementary file 1 [file 17930531]

| **Table S6** Log-rank tests of longevity. | | | | | | |
| --- | --- | --- | --- | --- | --- | --- |
| **Trait** | **Selected Odor** | **Sex** | **Term** | **df** | **c2** | ***P*** |
| Longevity | BUT | F | Selection | 2 | 0.0132 | 0.9934 |
|  |  |  | Line (Selection) | 6 | 35.054 | **0.0001** |
|  |  | M | Selection | 2 | 0.8218 | 0.6631 |
|  |  |  | Line (Selection) | 6 | 25.0064 | **0.0003** |
|  | CYC | F | Selection | 2 | 27.7402 | **0.0001** |
|  |  |  | Line (Selection) | 6 | 2.9510 | 0.8150 |
|  |  | M | Selection | 2 | 2.2457 | 0.3253 |
|  |  |  | Line (Selection) | 6 | 51.0302 | **0.0001** |
| Starvation Resistance | BUT | F | Selection | 2 | 14.7063 | **0.0006** |
|  |  |  | Line (Selection) | 6 | 108.8472 | **0.0001** |
|  |  | M | Selection | 2 | 32.0908 | **0.0001** |
|  |  |  | Line (Selection) | 6 | 27.0723 | **0.0002** |
|  | CYC | F | Selection | 2 | 1773.0880 | **0.0001** |
|  |  |  | Line (Selection) | 6 | 89.7471 | **0.0001** |
|  |  | M | Selection | 2 | 1836.7910 | **0.0001** |
|  |  |  | Line (Selection) | 6 | 23.2124 | **0.0001** |
| Degrees of freedom (df), Chi square value (c2), and *P*-value (*P*). | | | | | | |
| Significant terms in bold. | | | | | | |
